# Supplementary material for: Cytotoxic and Antioxidant Activity of Hypericum perforatum L. Extracts against Human Melanoma Cells from Different Stages of Cancer Progression, Cultured under Normoxia and Hypoxia
Source: MDPI journal article supplement (doi:10.3390/molecules28031509), 2023-02-03
Supplement: s1 [file s1]

# Cytotoxic and antioxidant activity of *Hypericum perforatum* L. extracts against human melanoma cells from different stages of cancer progression, cultured in normoxia and hypoxia conditions

Aleksandra Brankiewicz<sup>1,#</sup>, Sara Trzos<sup>2,#</sup>, Magdalena Mrozek<sup>2</sup>, Małgorzata Opydo<sup>3</sup>, Elżbieta Szostak<sup>4</sup>, Michał Dziurka<sup>5</sup>, Monika Tuleja<sup>1</sup>, Agnieszka Łoboda<sup>6</sup> and Ewa Pocheć<sup>2,\*</sup>

<sup>1</sup> Department of Plant Cytology and Embryology, Institute of Botany, Faculty of Biology, Jagiellonian University, 30-387 Kraków, Poland

<sup>2</sup> Department of Glycoconjugate Biochemistry, Institute of Zoology and Biomedical Research, Faculty of Biology, Jagiellonian University, 30-387 Kraków, Poland

<sup>3</sup> Laboratory of Experimental Hematology, Institute of Zoology and Biomedical Research, Faculty of Biology, Jagiellonian University, 30-387 Kraków, Poland

<sup>4</sup> Faculty of Chemistry, Jagiellonian University, 30-387 Kraków, Poland

<sup>5</sup> The Franciszek Górski Institute of Plant Physiology, Polish Academy of Sciences, 30-239 Kraków, Poland

<sup>6</sup> Department of Medical Biotechnology, Faculty of Biochemistry, Biophysics and Biotechnology, Jagiellonian University, 30-387 Kraków, Poland

# These authors contributed equally to this work.

\* Correspondence: ewa.pochec@uj.edu.pl; Tel.: +48 12 664 64 67

## 2.2. *Hypericum perforatum* extracts and hyperforin salt affect melanoma cell viability

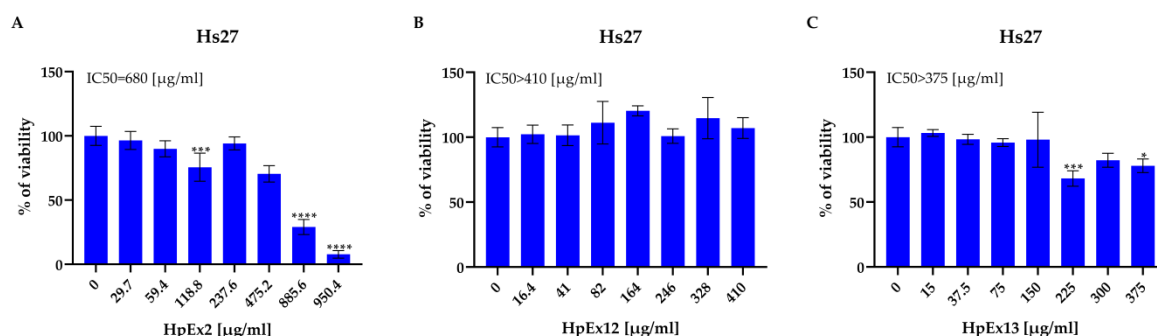

**Supplementary Figure S1.** Effect of *Hypericum perforatum* extracts HpEx2 (A), HpEx12 (B), and HpEx 13 (C) on the viability of Hs27 human skin fibroblasts cultured under normoxia, determined by MTT assay. Results are expressed as mean values  $\pm$  SD. IC50 values are shown above the bars. Statistical significance of the data was assessed using one-way ANOVA followed by Tukey's test for honest significant difference in multiple ranges. Significance levels between treated cells relative to untreated cells are indicated with asterisks as follows \* $p \leq 0.05$ ; \*\* $p \leq 0.01$ ; \*\*\* $p \leq 0.001$ ; \*\*\*\* $p \leq 0.0001$ .

**Supplementary Table S1.** The content of selected secondary metabolites in the volumes of *Hypericum perforatum* ethanolic extracts used to cell assays. Applied doses marked as C1 – C7.

| Extract No. |                                        | C1      | C2      | C3      | C5      | C6      | C7      |
|-------------|----------------------------------------|---------|---------|---------|---------|---------|---------|
| HpEx2       | Volume of extract per well [μl]        | 0.0825  | 0.165   | 0.33    | 1.32    | 2.46    | -       |
|             | Mass of extract per well [μg/0.1 ml]   | 2.97    | 5.94    | 11.88   | 47.52   | 88.56   | -       |
|             | Mass of polyphenols [μg/0.1ml]         | 0.2964  | 0.5928  | 1.1856  | 4.7425  | 8.8383  | -       |
|             | Mass of hyperforin per well [μg/0.1ml] | 0.00016 | 0.00032 | 0.00064 | 0.00255 | 0.00475 | -       |
| HpEx12      | Volume of extract per well [μl]        | 0.1     | 0.25    | 0.5     | 1.5     | 2       | 2.5     |
|             | Mass of extract per well [μg/0.1 ml]   | 1.64    | 4.1     | 8.2     | 24.6    | 32.8    | 41      |
|             | Mass of polyphenols [μg/0.1ml]         | 0.1455  | 0.3637  | 0.7273  | 2.1820  | 2.9093  | 3.6367  |
|             | Mass of hyperforin per well [μg/0.1ml] | 0.00748 | 0.0187  | 0.0374  | 0.11221 | 0.14962 | 0.18702 |
| HpEx13      | Volume of extract per well [μl]        | 0.1     | 0.25    | 0.5     | 1.5     | 2       | 2.5     |
|             | Mass of extract per well [μg/0.1 ml]   | 1.5     | 3.75    | 7.5     | 22.5    | 30      | 37.5    |
|             | Mass of polyphenols [μg/0.1ml]         | 0.1328  | 0.3319  | 0.6638  | 1.9913  | 2.655   | 3.3188  |
|             | Mass of hyperforin per well [μg/0.1ml] | 0.01019 | 0.02549 | 0.05096 | 0.15287 | 0.20382 | 0.25478 |

#### 4.1. Plant material and ethanolic extraction of *Hypericum perforatum*

**Supplementary Table S2.** Procedure of *Hypericum perforatum* ethanolic extract preparation.

|        | Extract No.                                                                               | HpEx12                                                    |                                              | HpEx13                                                               |                                                                      |
|--------|-------------------------------------------------------------------------------------------|-----------------------------------------------------------|----------------------------------------------|----------------------------------------------------------------------|----------------------------------------------------------------------|
| Step 1 | Raw material source                                                                       | <i>H. perforatum</i><br>wild<br>population 1              | <i>H. perforatum</i><br>wild<br>population 2 | <i>H. perforatum</i><br>regenerants<br>cultured from<br>population 1 | <i>H. perforatum</i><br>regenerants<br>cultured from<br>population 2 |
|        | Dry mass of lyophilised<br>raw material                                                   | 34.7 g                                                    | 33.1 g                                       | 36.4 g                                                               | 35.0 g                                                               |
|        | Volume of ethanol used<br>to extraction in Soxhlet<br>extractor                           | 250 ml                                                    | 250 ml                                       | 250 ml                                                               | 250 ml                                                               |
| Step 2 | Volume of evaporated<br>ethanol                                                           | about 125 ml                                              | about 125 ml                                 | about 125 ml                                                         | about 125 ml                                                         |
| Step 3 | Estimated concentration<br>of finally obtained<br>extracts (used for cell<br>stimulation) | 67.8 g / 250 ml = 271.2mg / ml                            |                                              | 71.4 g / 250 ml = 285.6 mg / ml                                      |                                                                      |
| Step 4 | Extraction efficiency<br>assessment                                                       | $\frac{16.4 \text{ mg/ml}}{271.2 \text{ mg/ml}} = 6,04\%$ |                                              | $\frac{15 \text{ mg/ml}}{285.6 \text{ mg/ml}} = 5,25\%$              |                                                                      |
